# Supplementary material for: Removal of Hydrogen Sulfide from Swine-Waste Biogas on a Pilot Scale Using Immobilized Paracoccus versutus CM1
Source: MDPI journal article supplement (doi:10.3390/microorganisms10112148), 2022-10-29
Supplement: s1 [file s1]

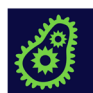

# Supplementary information

**Table S1.** Closest related microorganisms to nucleotide sequences excised from DGGE profiles from PG-laboratory scale biofilter compared with the NCBI nucleotide GenBank database

| DGGE band | GenBank accession numbers | Closest related microorganisms to nucleotide sequences excised from DGGE profiles compared with GenBank database |                                                                                |
|-----------|---------------------------|------------------------------------------------------------------------------------------------------------------|--------------------------------------------------------------------------------|
|           |                           | Standard databases (nr etc.)                                                                                     | rRNA/ITS databases (16 S rRNA)                                                 |
| 1PG       | MN181388                  | <i>Paracoccus versutus</i> (99.61%), <i>Paracoccus sp. strain CM1</i> (99.6%)                                    | <i>Paracoccus versutus</i> (99.61%)                                            |
| 2PG       | MN181389                  | <i>Paracoccus versutus</i> (98.86%)                                                                              | <i>Paracoccus versutus</i> (98.86%)                                            |
| 3PG       | MN181390                  | <i>Thiomonas sp.</i> (99.81%)                                                                                    | <i>Thiomonas arsenitoxydans</i> (99.81%), <i>Thiomonas intermedia</i> (99.24%) |
| 4PG       | MN181391                  | <i>Acidithiobacillus sp.</i> (96.92%)                                                                            | <i>Acidithiobacillus caldus</i> (96.15%)                                       |
| 5PG       | MN181392                  | <i>Uncultured Sulfuricurvum sp.</i> (99.15%)                                                                     | <i>Sulfuricurvum kujiense</i> (98.87%)                                         |
| 6PG       | MN181393                  | <i>Paracoccus versutus</i> (96.59%)                                                                              | <i>Paracoccus versutus</i> (96.59%)                                            |
| 7PG       | MN181394                  | <i>Thiomonas sp.</i> (99.62%)                                                                                    | <i>Thiomonas arsenitoxydans</i> (99.62%), <i>Thiomonas intermedia</i> (99.04%) |
| 8PG       | MN181395                  | <i>Thiomonas sp.</i> (95.85%)                                                                                    | <i>Thiomonas arsenitoxydans</i> (95.85%), <i>Thiomonas intermedia</i> (95.65%) |
| 9PG       | MN181396                  | <i>Sulfurovum riftiae</i> (92.40%)                                                                               | <i>Sulfurovum riftiae</i> (92.40%)                                             |
| 10PG      | MN181397                  | <i>Methyloparacoccus murrellii</i> (92.20%)                                                                      | <i>Methyloparacoccus murrellii</i> (92.20%)                                    |
| 11PG      | MN181398                  | <i>Sulfurovum riftiae</i> (92.61%)                                                                               | <i>Sulfurovum riftiae</i> (92.61%)                                             |
| 12PG      | MN181399                  | <i>Paracoccus versutus</i> (98.85%)                                                                              | <i>Paracoccus versutus</i> (98.85%)                                            |
| 13PG      | MN181400                  | <i>Sulfurovum riftiae</i> (92.54%)                                                                               | <i>Sulfurovum riftiae</i> (92.54%)                                             |
| 14PG      | MN181401                  | <i>Acidithiobacillus sp.</i> (98.08%)                                                                            | <i>Acidithiobacillus caldus</i> (97.7%)                                        |
| 15PG      | MN181402                  | <i>Sulfurovum riftiae</i> (97.26%), <i>Sulfurovum lithotrophicum</i> (96.58%),                                   | <i>Sulfurovum riftiae</i> (97.26%)                                             |

**Table S2.** Closest related microorganisms to nucleotide sequences excised from DGGE profiles from PUF-laboratory scale biofilter compared with the NCBI nucleotide GenBank database

| DGGE band | Accession numbers | Closest related microorganisms to nucleotide sequences excised from DGGE profiles compared with GenBank database |                                                                                               |
|-----------|-------------------|------------------------------------------------------------------------------------------------------------------|-----------------------------------------------------------------------------------------------|
|           |                   | Standard databases (nr etc.)                                                                                     | rRNA/ITS databases (16 S rRNA)                                                                |
| 1PUF      | MN181408          | <i>Paracoccus versutus</i> (99.6%), <i>Paracoccus sp. strain CM1</i> (99.4%)                                     | <i>Paracoccus versutus</i> (99.6%)                                                            |
| 2PUF      | MN181409          | <i>Paracoccus versutus</i> (99.3%)                                                                               | <i>Paracoccus versutus</i> (99.3%)                                                            |
| 3PUF      | MN181410          | <i>Thiomonas sp.</i> (99.8%)                                                                                     | <i>Thiomonas arsenitoxydans</i> (99.8%),<br><i>Thiomonas intermedia</i> (99.2%)               |
| 4PUF      | MN181411          | <i>Acidithiobacillus thiooxidans</i> (98.0%)<br><i>Acidithiobacillus albertensis</i>                             | <i>Acidithiobacillus thiooxidans</i> (98.0%)                                                  |
| 5PUF      | MN181412          | <i>Acidithiobacillus thiooxidans</i> (98.6%)                                                                     | <i>Acidithiobacillus thiooxidans</i> (98.6%)                                                  |
| 6PUF      | MN181413          | <i>Acidithiobacillus thiooxidans</i> (99.6%)                                                                     | <i>Acidithiobacillus thiooxidans</i> (99.6%)                                                  |
| 7PUF      | MN181414          | <i>Acidithiobacillus thiooxidans</i> (99.2%)                                                                     | <i>Acidithiobacillus thiooxidans</i> (99.2%)                                                  |
| 8PUF      | MN181415          | <i>Acidithiobacillus thiooxidans</i> (99.2%)                                                                     | <i>Acidithiobacillus thiooxidans</i> (99.2%)                                                  |
| 9PUF      | MN181416          | <i>Acidithiobacillus thiooxidans</i> (99.8%),<br><i>Acidithiobacillus albertensis</i> (99.8%)                    | <i>Acidithiobacillus thiooxidans</i> (99.8%),<br><i>Acidithiobacillus thiooxidans</i> (99.8%) |
| 10PUF     | MN181417          | <i>Acidithiobacillus thiooxidans</i> (99.8%)                                                                     | <i>Acidithiobacillus thiooxidans</i> (99.6%)                                                  |
| 11PUF     | MN181418          | <i>Paracoccus versutus</i> (94.62%)                                                                              | <i>Paracoccus versutus</i> (94.2%)                                                            |
| 12PUF     | MN181419          | <i>Thiomonas sp.</i> (99.6%)                                                                                     | <i>Thiomonas arsenitoxydans</i> (99.6%),<br><i>Thiomonas intermedia</i> (99.0%)               |
| 13PUF     | MN181420          | <i>Acidithiobacillus thiooxidans</i> (99.8%)                                                                     | <i>Acidithiobacillus thiooxidans</i> (99.6%)                                                  |
| 14PUF     | MN181421          | <i>Acidithiobacillus thiooxidans</i> (99.8%)                                                                     | <i>Acidithiobacillus thiooxidans</i> (99.6%)                                                  |
| 15PUF     | MN181422          | <i>Acidithiobacillus thiooxidans</i> (99.6%)                                                                     | <i>Acidithiobacillus thiooxidans</i> (98.6%)                                                  |
| 16PUF     | MN181423          | <i>Rhodanobacter glycinis</i> (98.6%)                                                                            | <i>Rhodanobacter glycinis</i> (98.3%)                                                         |

**Table S3.** Closest related microorganisms to nucleotide sequences excised from DGGE profiles from PG-vertical pilot-scale biofilter compared with the NCBI nucleotide GenBank database

| DGGE band | GenBank accession numbers | Closest related microorganisms to nucleotide sequences excised from DGGE profiles compared with GenBank database |                                                                                                            |
|-----------|---------------------------|------------------------------------------------------------------------------------------------------------------|------------------------------------------------------------------------------------------------------------|
|           |                           | Standard databases (nr etc.)                                                                                     | rRNA/ITS databases (16 S rRNA)                                                                             |
| 1PG_VP1   | MN420882                  | <i>Paracoccus versutus</i> (99.8%), <i>Paracoccus</i> sp. strain CM1 (99.8%)                                     | <i>Paracoccus versutus</i> (99.8%)                                                                         |
| 2PG_VP2   | MN181883                  | <i>Paracoccus versutus</i> (98.2%), <i>Paracoccus</i> sp. strain CM1 (98.2%)                                     | <i>Paracoccus versutus</i> (98.2%)                                                                         |
| 3PG_VP3   | MN181884                  | <i>Acidithiobacillus</i> sp. strain V1 (MT009439) (99.47%)                                                       | <i>Acidithiobacillus caldus</i> strain KU 1 (96.49%)                                                       |
| 4PG_VP4   | MN181885                  | <i>Uncultured epsilon proteobacterium</i> clone H2OTU12 KM016254) (97.8%), <i>Sulfuricurvum kujiense</i> (97.8%) | <i>Sulfuricurvum kujiense</i> (97.8%)                                                                      |
| 5PG_VP5   | MN181886                  | <i>Acidithiobacillus</i> sp. strain V1 (99.4%)                                                                   | <i>Acidithiobacillus caldus</i> strain KU 1 (96.49%)                                                       |
| 6PG_VP6   | MN181887                  | <i>Paracoccus versutus</i> strain NLB7 (99.2%)                                                                   | <i>Paracoccus versutus</i> strain ATCC 25364 (99.2%)                                                       |
| 7PG_VP7   | MN181888                  | <i>Acidithiobacillus</i> sp. strain V1 (97.8%)                                                                   | <i>Acidithiobacillus caldus</i> strain KU (95.0%)                                                          |
| 8PG_VP8   | MN181889                  | <i>Acetobacteroides hydrogenigenes</i> (98.1%)                                                                   | <i>Acetobacteroides hydrogenigenes</i> strain RL-C (98.1%)                                                 |
| 9PG_VP9   | MN181890                  | <i>Uncultured bacterium</i> clone AS3cl15 (KU249580) (98.94%), <i>Acidithiobacillus thiooxidans</i> (98.7%)      | <i>Acidithiobacillus thiooxidans</i> (98.7%)                                                               |
| 10PG_VP10 | MN181891                  | <i>Uncultured bacterium</i> clone AS3cl15 (KU249580) (98.25%), <i>Acidithiobacillus thiooxidans</i> (98.08%)     | <i>Acidithiobacillus thiooxidans</i> (98.08%)                                                              |
| 11PG_VP11 | MN181892                  | <i>Uncultured bacterium</i> clone AS3cl15 (KU249580) (98.2%), <i>Acidithiobacillus thiooxidans</i> (98.06%)      | <i>Acidithiobacillus thiooxidans</i> (98.06%)                                                              |
| 12PG_VP12 | MN181893                  | <i>Thiomonas</i> sp. (99.6%)                                                                                     | <i>Thiomonas arsenitoxydans</i> (99.6%), <i>Thiomonas intermedia</i> (99.1%)                               |
| 13PG_VP13 | MN181894                  | <i>Thiomonas intermedia</i> (98.54%), <i>Thiomonas</i> sp. (98.54%)                                              | <i>Thiomonas intermedia</i> (98.54%)                                                                       |
| 14PG_VP14 | MN181895                  | <i>Uncultured bacterium</i> clone AS3cl15 (KU249580) (98.07%), <i>Acidithiobacillus thiooxidans</i> (97.89%)     | <i>Acidithiobacillus thiooxidans</i> (97.89%)                                                              |
| 15PG_VP15 | MN181896                  | <i>Thiomonas</i> sp. CB2 (99.6%)                                                                                 | <i>Thiomonas arsenitoxydans</i> strain 3As (99.64%), <i>Thiomonas intermedia</i> strain ATCC 15466 (99.1%) |

**Table S4.** Closest related microorganisms to nucleotide sequences excised from DGGE profiles from PUF-vertical pilot-scale biofilter compared with the NCBI nucleotide GenBank database

| DGGE band | GenBank accession numbers | Closest related microorganisms to nucleotide sequences excised from DGGE profiles compared with GenBank database |                                                                                 |
|-----------|---------------------------|------------------------------------------------------------------------------------------------------------------|---------------------------------------------------------------------------------|
|           |                           | Standard databases (nr etc.)                                                                                     | rRNA/ITS databases (16 S rRNA)                                                  |
| 1PUF_VP1  | MN420906                  | <i>Paracoccus versutus</i> strain NLB7 (99.4%),<br><i>Paracoccus</i> sp. strain CM1 (98.4%)                      | <i>Paracoccus versutus</i> strain ATCC 25364 (99.4%)                            |
| 2PUF_VP2  | MN420907                  | <i>Paracoccus versutus</i> strain NLB7 (97.9%),<br><i>Paracoccus</i> sp. strain CM1 (97.9%)                      | <i>Paracoccus versutus</i> strain ATCC 25364 (97.9%)                            |
| 3PUF_VP3  | MN420908                  | <i>Acidithiobacillus thiooxidans</i> strain S30A4 (99.8%)                                                        | <i>Acidithiobacillus thiooxidans</i> ATCC 19377 (99.8%)                         |
| 4PUF_VP4  | MN420909                  | <i>Acidithiobacillus thiooxidans</i> strain S30A4 (99.2%)                                                        | <i>Acidithiobacillus thiooxidans</i> ATCC 19377 (96.9%)                         |
| 5PUF_VP5  | MN420910                  | <i>Acidithiobacillus thiooxidans</i> strain S30A4 (99.2%)                                                        | <i>Acidithiobacillus thiooxidans</i> ATCC 19377 (99.8%)                         |
| 6PUF_VP6  | MN420911                  | <i>Acidithiobacillus thiooxidans</i> strain S30A4 (99.6%)                                                        | <i>Acidithiobacillus thiooxidans</i> ATCC 19377 (99.6%)                         |
| 7PUF_VP7  | MN420912                  | <i>Acidithiobacillus thiooxidans</i> strain S30A4 (97.3%)                                                        | <i>Acidithiobacillus thiooxidans</i> ATCC 19377 (97.3%)                         |
| 8PUF_VP8  | MN420913                  | <i>Acidithiobacillus thiooxidans</i> strain S30A4 (99.2%)                                                        | <i>Acidithiobacillus thiooxidans</i> (99.2%)                                    |
| 9PUF_VP9  | MN420914                  | <i>Acidithiobacillus</i> sp. strain V1 (99.2%)                                                                   | <i>Acidithiobacillus caldus</i> strain KU (96.3%)                               |
| 10PG_VP10 | MN420915                  | <i>Thiomonas</i> sp. (99.2%)                                                                                     | <i>Thiomonas arsenitoxydans</i> (99.2%),<br><i>Thiomonas intermedia</i> (99.1%) |

**Table S5.** Closest related microorganisms to nucleotide sequences excised from DGGE profiles from PG-horizontal pilot-scale biofilter compared with the NCBI nucleotide GenBank database

| DGGE band | GenBank accession numbers | Closest related microorganisms to nucleotide sequences excised from DGGE profiles compared with GenBank database |                                                                                 |
|-----------|---------------------------|------------------------------------------------------------------------------------------------------------------|---------------------------------------------------------------------------------|
|           |                           | Standard databases (nr etc.)                                                                                     | rRNA/ITS databases (16 S rRNA)                                                  |
| 1PG_HP1   | MN420869                  | <i>Paracoccus versutus</i> strain NLB7 (99.2%),<br><i>Paracoccus</i> sp. strain CM1 (98.2%)                      | <i>Paracoccus versutus</i> strain ATCC 25364 (99.2%)                            |
| 2PG_HP2   | MN420870                  | <i>Acidithiobacillus thiooxidans</i> strain S30A4 (99.7%)                                                        | <i>Acidithiobacillus thiooxidans</i> ATCC 19377 (99.7%)                         |
| 3PG_HP3   | MN420871                  | <i>Metallibacterium schefflera</i> (99.2%)                                                                       | <i>Metallibacterium schefflera</i> (99.2%)                                      |
| 4PG_HP4   | MN420872                  | <i>Paracoccus versutus</i> strain NLB7 (97.2%),<br><i>Paracoccus</i> sp. strain CM1 (97.2%)                      | <i>Paracoccus versutus</i> strain ATCC 25364 (97.2%)                            |
| 5PG_HP5   | MN420873                  | <i>Acidithiobacillus thiooxidans</i> strain S30A4 (99.8%)                                                        | <i>Acidithiobacillus thiooxidans</i> ATCC 19377 (99.8%)                         |
| 6PG_HP6   | MN420874                  | <i>Acidithiobacillus thiooxidans</i> strain S30A4 (99.4%)                                                        | <i>Acidithiobacillus thiooxidans</i> ATCC 19377 (99.4%)                         |
| 7PG_HP7   | MN420875                  | Uncultured bacterium clone AS3cl15 (KU249580) (98.5%), <i>Acidithiobacillus thiooxidans</i> strain S30A4 (98.3%) | <i>Acidithiobacillus thiooxidans</i> ATCC 19377 (98.3%)                         |
| 8PG_HP8   | MN420876                  | <i>Thiomonas</i> sp. (99.6%)                                                                                     | <i>Thiomonas arsenitoxydans</i> (99.6%),<br><i>Thiomonas intermedia</i> (99.1%) |
| 9PG_HP9   | MN420877                  | Uncultured bacterium clone AS3cl15 (KU249580) (98.1%), <i>Acidithiobacillus thiooxidans</i> strain S30A4 (97.0%) | <i>Acidithiobacillus thiooxidans</i> ATCC 19377 (98.0%)                         |
| 10PG_HP10 | MN420878                  | <i>Acidithiobacillus thiooxidans</i> strain S30A4 (99.6%)                                                        | <i>Acidithiobacillus thiooxidans</i> ATCC 19377 (99.6%)                         |
| 11PG_HP11 | MN420879                  | <i>Acidithiobacillus thiooxidans</i> strain S30A4 (99.6%)                                                        | <i>Acidithiobacillus thiooxidans</i> ATCC 19377 (99.6%)                         |
| 12PG_HP12 | MN420880                  | <i>Acidithiobacillus</i> sp. strain V1 (99.4%)                                                                   | <i>Acidithiobacillus caldus</i> strain KU (96.4%)                               |

**Table S6.** Closest related microorganisms to nucleotide sequences excised from DGGE profiles from PUF-horizontal pilot-scale biofilter compared with the NCBI nucleotide GenBank database

| DGGE band | GenBank accession numbers | Closest related microorganisms to nucleotide sequences excised from DGGE profiles compared with GenBank database |                                                         |
|-----------|---------------------------|------------------------------------------------------------------------------------------------------------------|---------------------------------------------------------|
|           |                           | Standard databases (nr etc.)                                                                                     | rRNA/ITS databases (16 S rRNA)                          |
| 1PUF_HP1  | MN420896                  | <i>Paracoccus versutus</i> strain NLB7 (99.8%),<br><i>Paracoccus</i> sp. strain CM1 (99.8%)                      | <i>Paracoccus versutus</i> strain ATCC 25364 (99.8%)    |
| 2PUF_HP2  | MN420897                  | <i>Paracoccus versutus</i> strain NLB7 (99.6%),<br><i>Paracoccus</i> sp. strain CM1 (99.6%)                      | <i>Paracoccus versutus</i> strain ATCC 25364 (99.6%)    |
| 3PUF_HP3  | MN420898                  | <i>Acidithiobacillus thiooxidans</i> strain S30A4 (99.8%)                                                        | <i>Acidithiobacillus thiooxidans</i> ATCC 19377 (99.8%) |
| 4PUF_HP4  | MN420899                  | <i>Acidithiobacillus thiooxidans</i> strain S30A4 (99.8%)                                                        | <i>Acidithiobacillus thiooxidans</i> ATCC 19377 (99.8%) |
| 5PUF_HP5  | MN420900                  | <i>Acidithiobacillus thiooxidans</i> strain S30A4 (99.8%)                                                        | <i>Acidithiobacillus thiooxidans</i> ATCC 19377 (99.8%) |
| 6PUF_HP6  | MN420901                  | <i>Acidithiobacillus thiooxidans</i> strain S30A4 (99.8%)                                                        | <i>Acidithiobacillus thiooxidans</i> ATCC 19377 (99.8%) |
| 7PUF_HP7  | MN420902                  | <i>Acidithiobacillus thiooxidans</i> strain S30A4 (99.8%)                                                        | <i>Acidithiobacillus thiooxidans</i> ATCC 19377 (99.8%) |
| 8PUF_HP8  | MN420903                  | <i>Acidithiobacillus thiooxidans</i> strain S30A4 (99.8%)                                                        | <i>Acidithiobacillus thiooxidans</i> ATCC 19377 (99.8%) |
| 9PUF_HP9  | MN420904                  | <i>Thiomonas intermedia</i> (99.8%)                                                                              | <i>Thiomonas intermedia</i> (99.8%)                     |
| 10PG_HP10 | MN420905                  | <i>Acidithiobacillus thiooxidans</i> strain S30A4 (97.3%)                                                        | <i>Acidithiobacillus thiooxidans</i> ATCC 19377 (97.7%) |

**Table S7.** The statistical analysis was performed using one-way analysis of variance (ANOVA) and Duncan's multiple range tests.

| Packing materials | pH | Number of <i>P. versutus</i> CM1 on packing materials (log cfu/g)* |                           |                           |                           |                           |
|-------------------|----|--------------------------------------------------------------------|---------------------------|---------------------------|---------------------------|---------------------------|
|                   |    | Days                                                               |                           |                           |                           |                           |
|                   |    | 1                                                                  | 2                         | 3                         | 4                         | 5                         |
| PG                | 4  | 9.57 <sup>c</sup> ± 0.09                                           | 9.37 <sup>b</sup> ± 0.03  | 9.41 <sup>c</sup> ± 0.02  | 9.14 <sup>b</sup> ± 0.02  | 8.93 <sup>c</sup> ± 0.08  |
|                   | 5  | 9.73 <sup>b</sup> ± 0.04                                           | 9.16 <sup>c</sup> ± 0.02  | 9.62 <sup>b</sup> ± 0.03  | 9.13 <sup>b</sup> ± 0.03  | 9.20 <sup>b</sup> ± 0.02  |
|                   | 7  | 9.96 <sup>a</sup> ± 0.03                                           | 9.55 <sup>a</sup> ± 0.07  | 9.75 <sup>a</sup> ± 0.02  | 9.67 <sup>a</sup> ± 0.13  | 9.85 <sup>a</sup> ± 0.03  |
|                   | 12 | 8.38 <sup>d</sup> ± 0.02                                           | 5.87 <sup>d</sup> ± 0.03  | 5.17 <sup>d</sup> ± 0.06  | 5.24 <sup>c</sup> ± 0.02  | 4.95 <sup>d</sup> ± 0.03  |
| PUF               | 4  | 5.02 <sup>c</sup> ± 0.73                                           | 4.11 <sup>c</sup> ± 0.55  | 4.12 <sup>c</sup> ± 0.55  | 3.32 <sup>c</sup> ± 0.21  | 3.15 <sup>c</sup> ± 0.61  |
|                   | 5  | 9.73 <sup>b</sup> ± 0.02                                           | 9.66 <sup>ba</sup> ± 0.06 | 8.93 <sup>b</sup> ± 0.02  | 9.10 <sup>b</sup> ± 0.14  | 7.81 <sup>b</sup> ± 0.10  |
|                   | 7  | 10.64 <sup>a</sup> ± 0.49                                          | 10.13 <sup>a</sup> ± 0.02 | 10.92 <sup>a</sup> ± 0.63 | 11.62 <sup>a</sup> ± 0.07 | 11.27 <sup>a</sup> ± 0.03 |
|                   | 12 | 9.99 <sup>ab</sup> ± 0.03                                          | 9.39 <sup>b</sup> ± 0.05  | 9.15 <sup>b</sup> ± 0.02  | 9.28 <sup>b</sup> ± 0.08  | 10.22 <sup>b</sup> ± 0.03 |

\*All results with  $p < 0.05$  are considered to be significantly different from each other. The data from different pH values for each day was compared together

**Table S8.** The statistical analysis was performed using one-way analysis of variance (ANOVA) and Duncan's multiple range tests.

| Packing materials | Temp (°C) | Number of <i>P. versutus</i> CM1 on packing materials (log cfu/g)* |                           |                           |                            |                           |
|-------------------|-----------|--------------------------------------------------------------------|---------------------------|---------------------------|----------------------------|---------------------------|
|                   |           | Days                                                               |                           |                           |                            |                           |
|                   |           | 1                                                                  | 2                         | 3                         | 4                          | 5                         |
| PG                | 25        | 10.61 <sup>a</sup> ± 0.13                                          | 9.65 <sup>a</sup> ± 0.02  | 9.79 <sup>a</sup> ± 0.07  | 10.46 <sup>a</sup> ± 0.01  | 9.76 <sup>b</sup> ± 0.06  |
|                   | 30        | 9.99 <sup>c</sup> ± 0.02                                           | 9.76 <sup>a</sup> ± 0.13  | 9.73 <sup>a</sup> ± 0.01  | 10.23 <sup>ab</sup> ± 0.02 | 9.65 <sup>c</sup> ± 0.04  |
|                   | 35        | 10.23 <sup>b</sup> ± 0.15                                          | 9.77 <sup>a</sup> ± 0.04  | 10.00 <sup>a</sup> ± 0.43 | 9.98 <sup>b</sup> ± 0.25   | 10.29 <sup>a</sup> ± 0.55 |
|                   | 40        | 9.81 <sup>c</sup> ± 0.09                                           | 9.73 <sup>a</sup> ± 0.09  | 9.27 <sup>b</sup> ± 0.06  | 9.14 <sup>b</sup> ± 0.06   | 9.62 <sup>b</sup> ± 0.26  |
|                   | 45        | 9.08 <sup>d</sup> ± 0.07                                           | 8.13 <sup>b</sup> ± 0.07  | 8.17 <sup>c</sup> ± 0.02  | 8.26 <sup>c</sup> ± 0.16   | 8.37 <sup>d</sup> ± 0.09  |
| PUF               | 25        | 11.78 <sup>b</sup> ± 0.11                                          | 11.52 <sup>c</sup> ± 0.02 | 11.81 <sup>b</sup> ± 0.03 | 11.69 <sup>b</sup> ± 0.04  | 11.36 <sup>b</sup> ± 0.17 |
|                   | 30        | 11.52 <sup>c</sup> ± 0.05                                          | 12.07 <sup>a</sup> ± 0.09 | 12.08 <sup>a</sup> ± 0.03 | 11.51 <sup>c</sup> ± 0.09  | 11.50 <sup>b</sup> ± 0.12 |
|                   | 35        | 12.73 <sup>a</sup> ± 0.07                                          | 12.13 <sup>a</sup> ± 0.05 | 12.13 <sup>a</sup> ± 0.02 | 12.46 <sup>a</sup> ± 0.05  | 12.65 <sup>a</sup> ± 0.08 |
|                   | 40        | 11.46 <sup>c</sup> ± 0.08                                          | 11.73 <sup>b</sup> ± 0.07 | 10.98 <sup>c</sup> ± 0.03 | 11.34 <sup>d</sup> ± 0.01  | 11.16 <sup>c</sup> ± 0.06 |
|                   | 45        | 11.21 <sup>d</sup> ± 0.20                                          | 10.24 <sup>d</sup> ± 0.05 | 9.87 <sup>d</sup> ± 0.08  | 10.29 <sup>e</sup> ± 0.02  | 10.41 <sup>d</sup> ± 0.06 |

\*All results with  $p < 0.05$  are considered to be significantly different from each other. The data from different temperatures for each day was compared together.

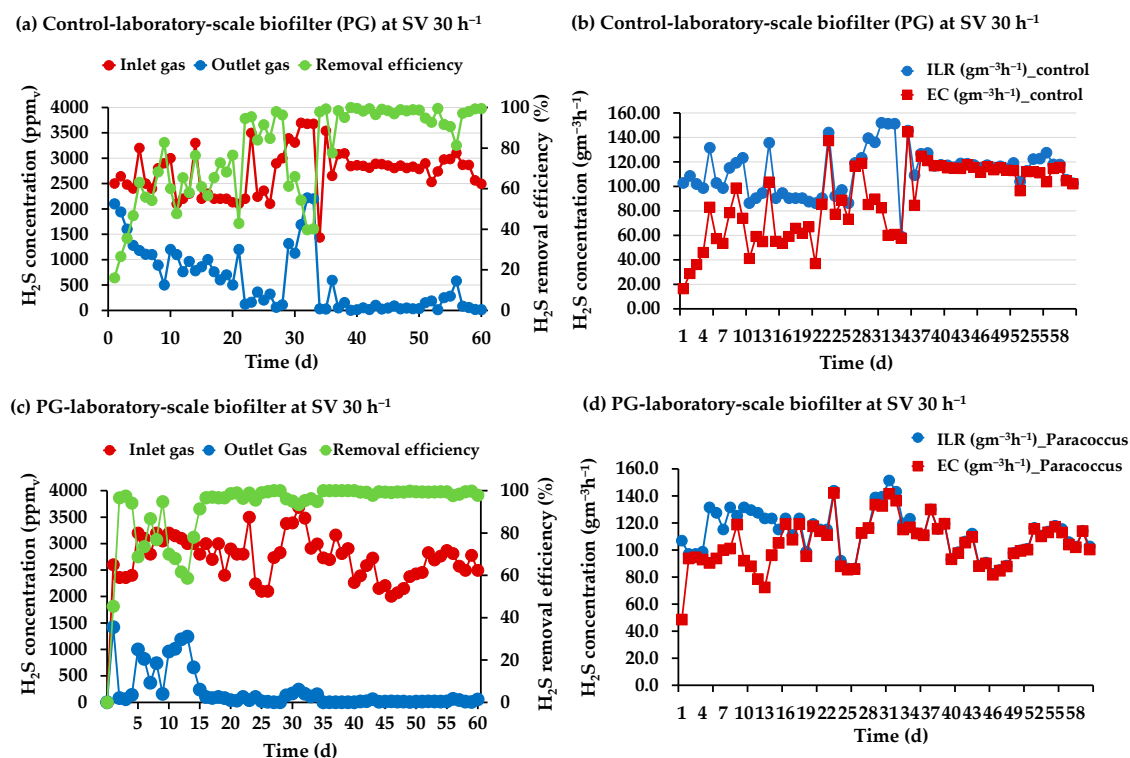

**Figure S1.** Comparison of biofilter performances between the PG laboratory-scale control biofilter without the immobilization of *Paracoccus versutus* CM1 and the PG laboratory-scale biofilter with *P. versutus* CM1.

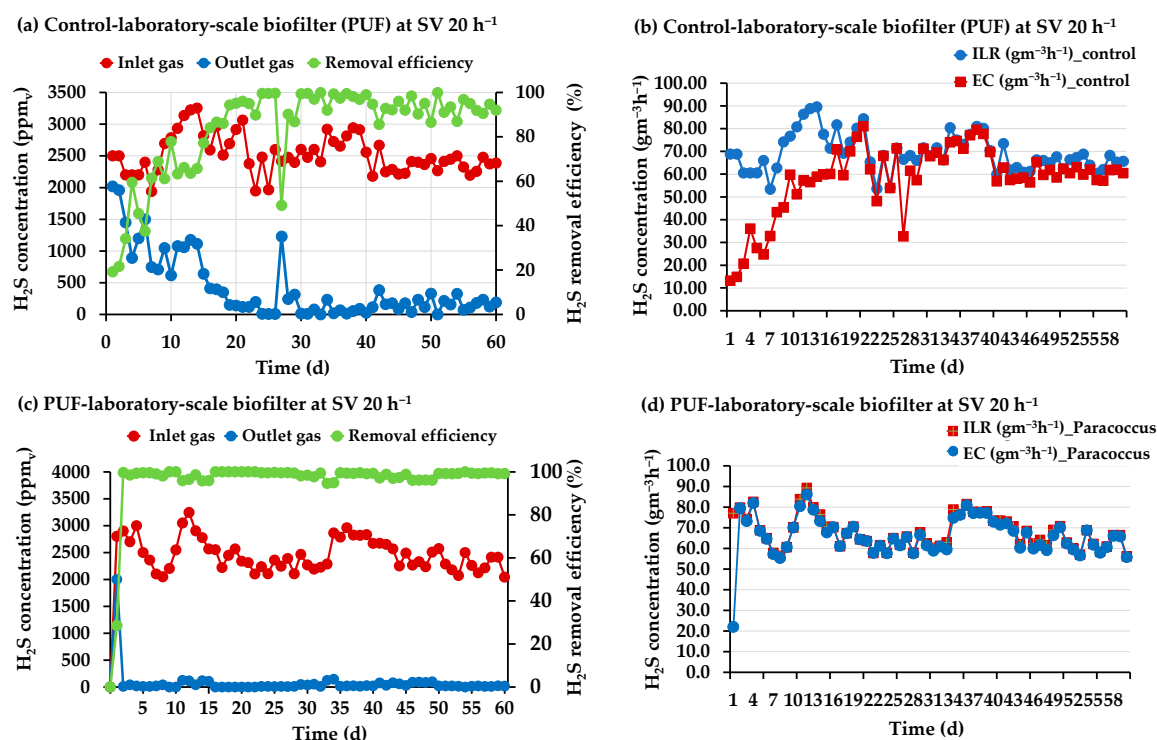

**Figure S2.** Comparison of biofilter performances between the PUF laboratory-scale control biofilter without the immobilization of *Paracoccus versutus* CM1 and the PUF laboratory-scale biofilter with *P. versutus* CM1.



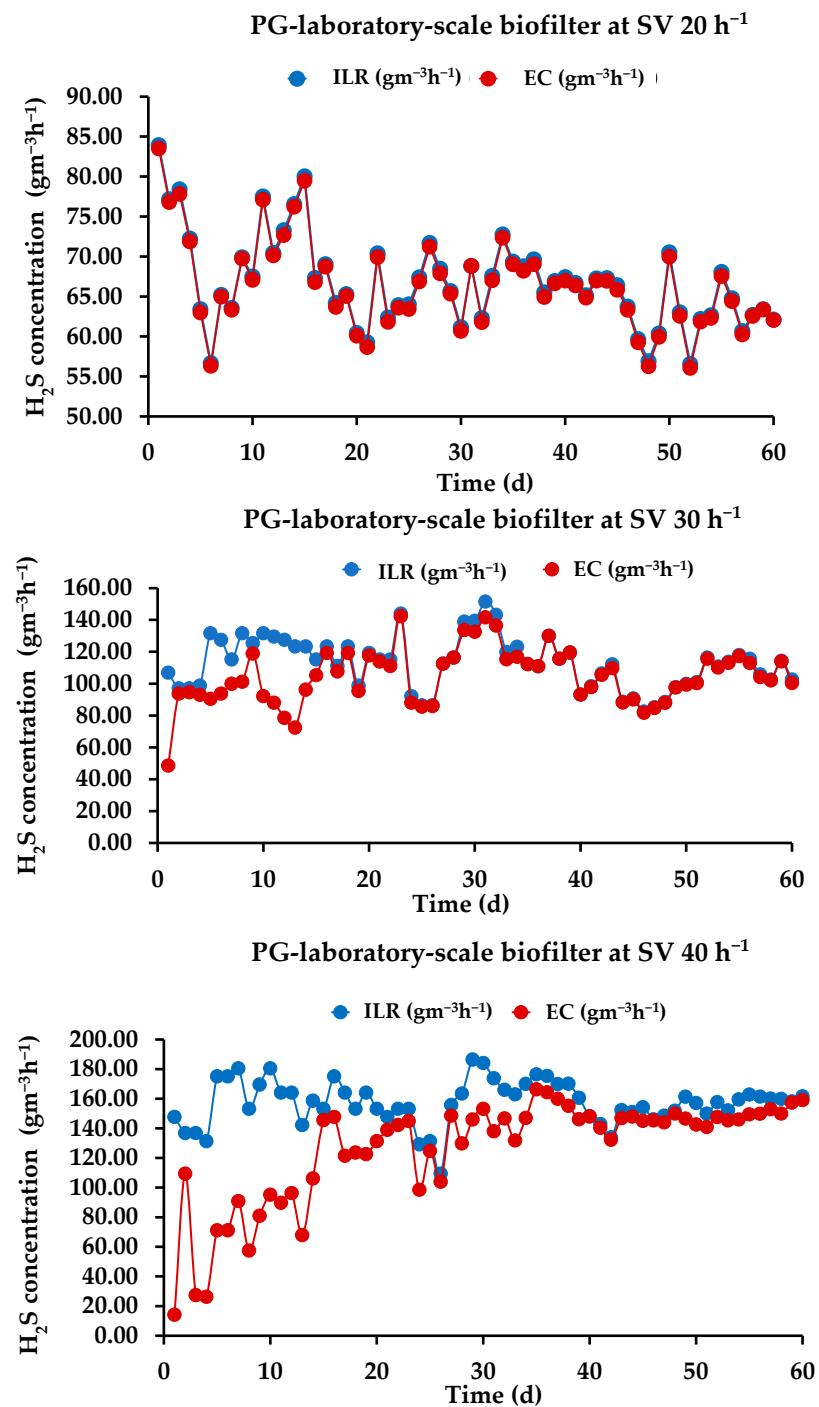

Figure S3. Laboratory-scale H<sub>2</sub>S elimination using various SVs in PG biofilters

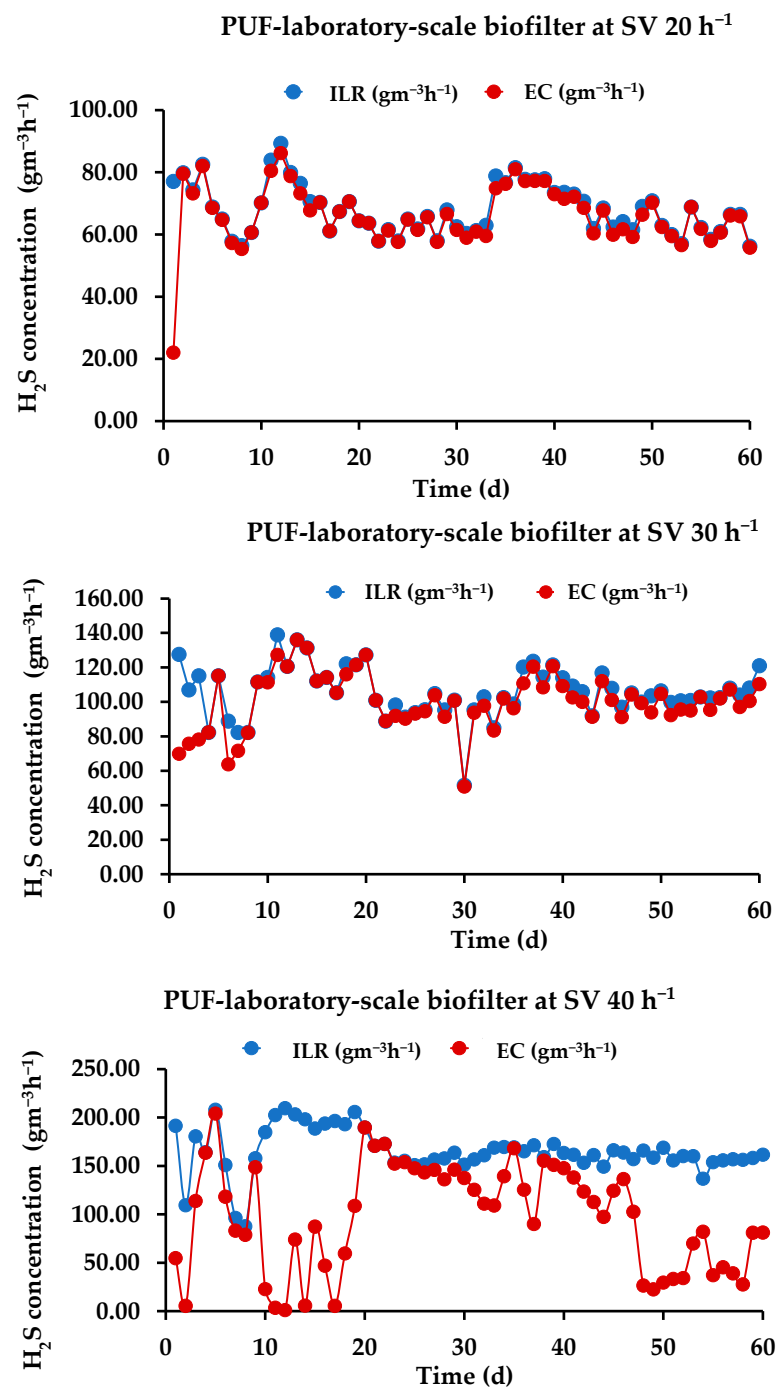

**Figure S4.** Laboratory-scale H<sub>2</sub>S elimination using various SVs in PUF biofilters

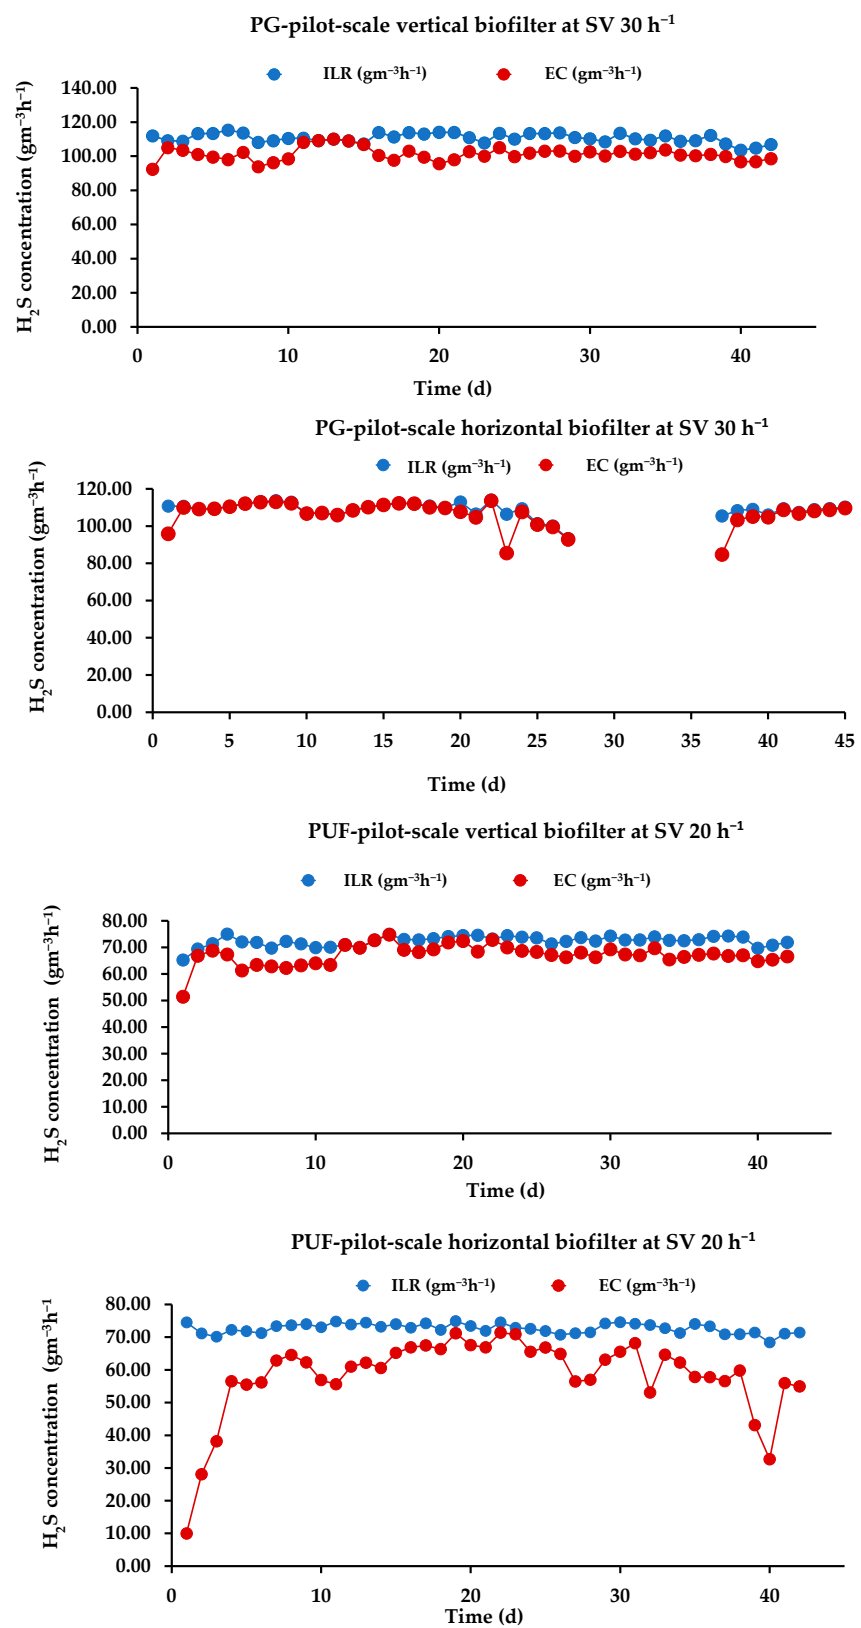

Figure S5. Pilot-scale H<sub>2</sub>S elimination in vertical and horizontal PG and PUF biofilters

(a) PG-laboratory-scale biofilter (SV 30 h<sup>-1</sup>)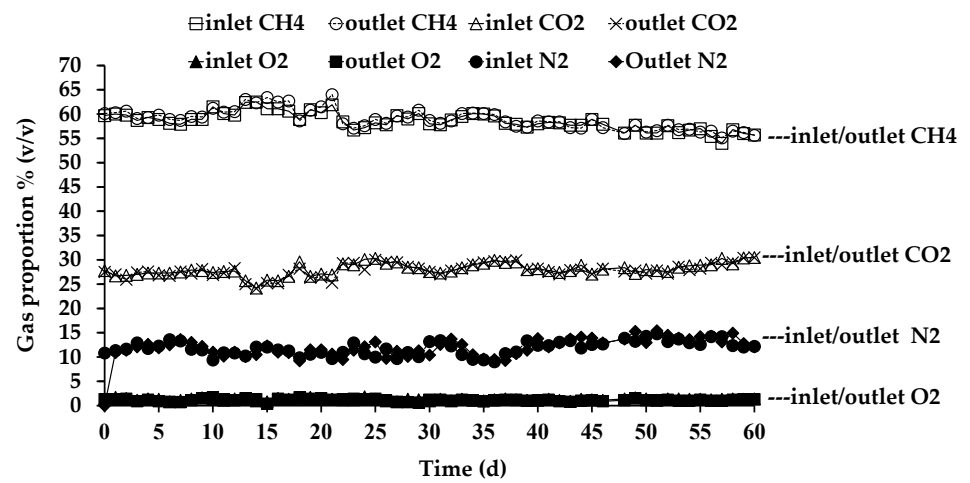(b) PUF-laboratory-scale biofilter (SV 20 h<sup>-1</sup>)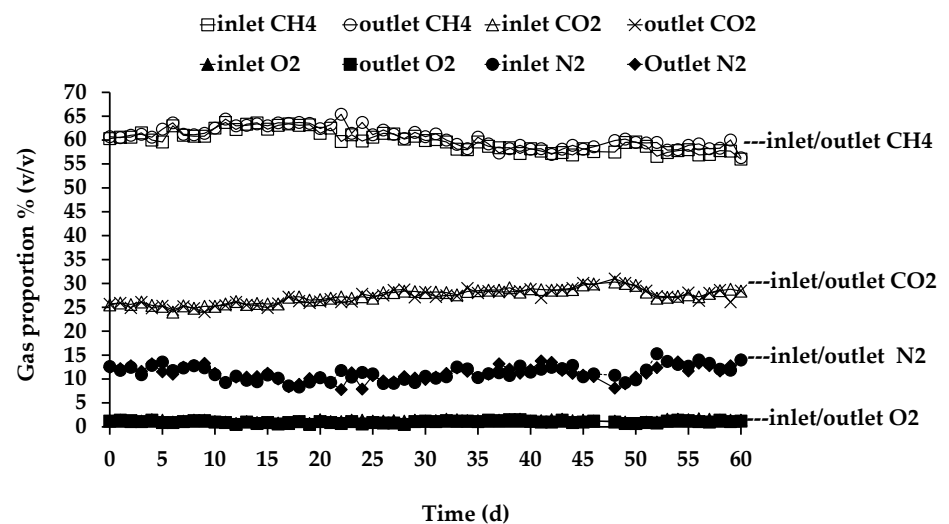

**Figure S6.** Biogas compositions in the laboratory-scale biofilters packed with immobilized *P. versutus* CM1 cells. (a) PG biofilter and (b) PUF biofilter. The biofiltration was operated at the SVs of 30 and 20 h<sup>-1</sup>, respectively.

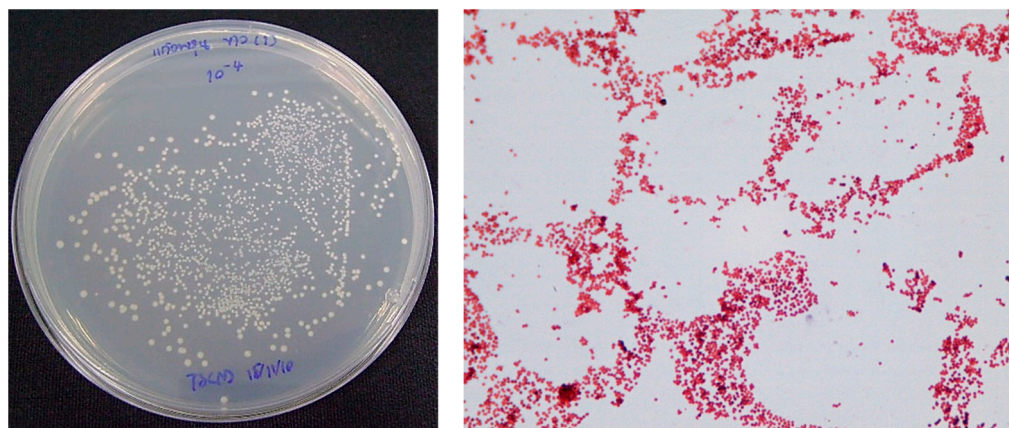

**Figure S7.** Colonies and cells of *P.versutus* CM1 on TSA medium collected from packing materials during the operation.

**(a) Laboratory-scale biofilters**

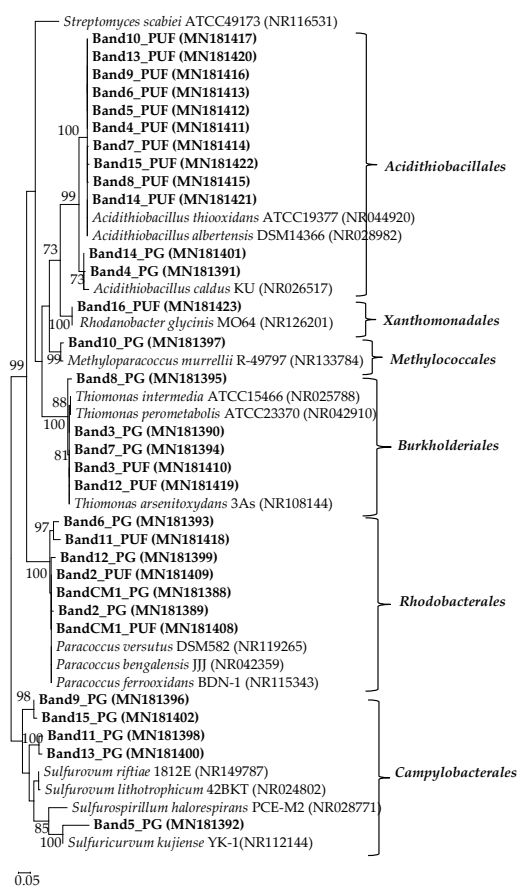

**(b) Pilot-scale biofilters**

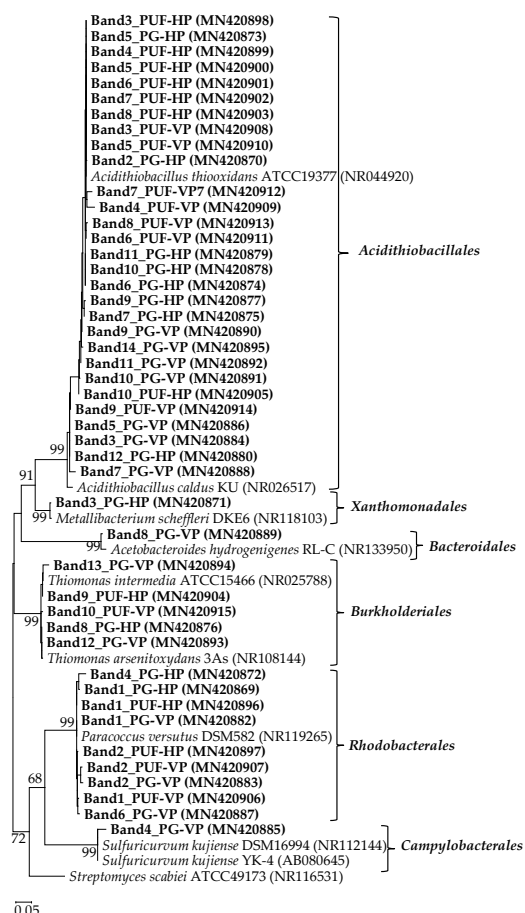

**Figure S8.** The phylogenetic tree constructed from partial 16S rRNA sequences of bacteria indicates the major bacterial taxa present in the PG and PUF of (a) laboratory-scale biofilters, and (b) pilot-scale biofilters using a neighbor-joining algorithm with 1,000 bootstrapping.
